# Supplementary material for: Identification and Repurposing of Trisubstituted Harmine Derivatives as Novel Inhibitors of Mycobacterium tuberculosis Phosphoserine Phosphatase
Source: MDPI journal article supplement (doi:10.3390/molecules25020415), 2020-01-19
Supplement: s1 [file s1]

# Supplementary Materials: Identification and repurposing of trisubstituted harmine derivatives as novel inhibitors of *Mycobacterium tuberculosis* phosphoserine phosphatase

Elise Pierson <sup>1,†,\*</sup>, Marie Haufroid <sup>1,†,\*</sup>, Tannu Priya Gosain <sup>2</sup>, Pankaj Chopra <sup>2</sup>, Ramandeep Singh <sup>2</sup> and Johan Wouters <sup>1</sup>

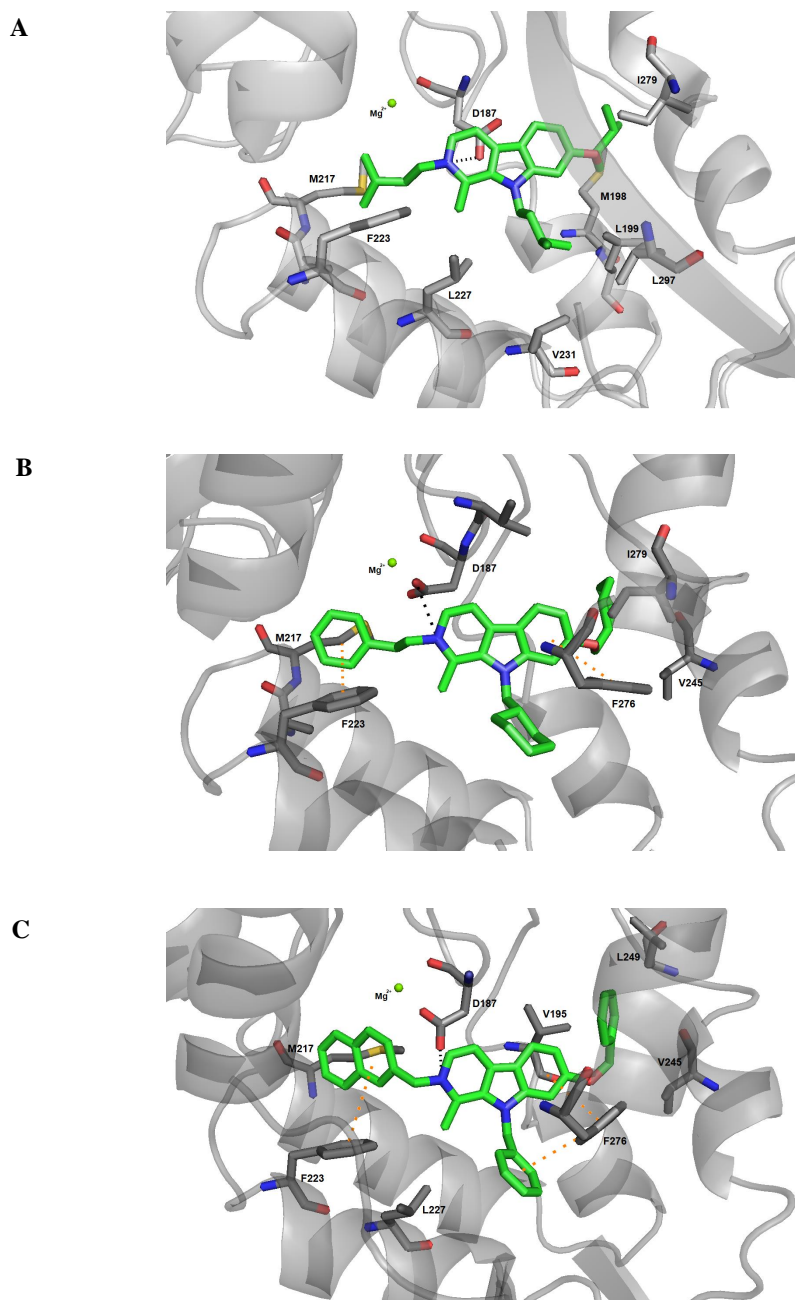

**Figure S1.** Structure of docked inhibitors (green) 88 (A), 91 (B) and 95 (C) within the active site of SerB2.

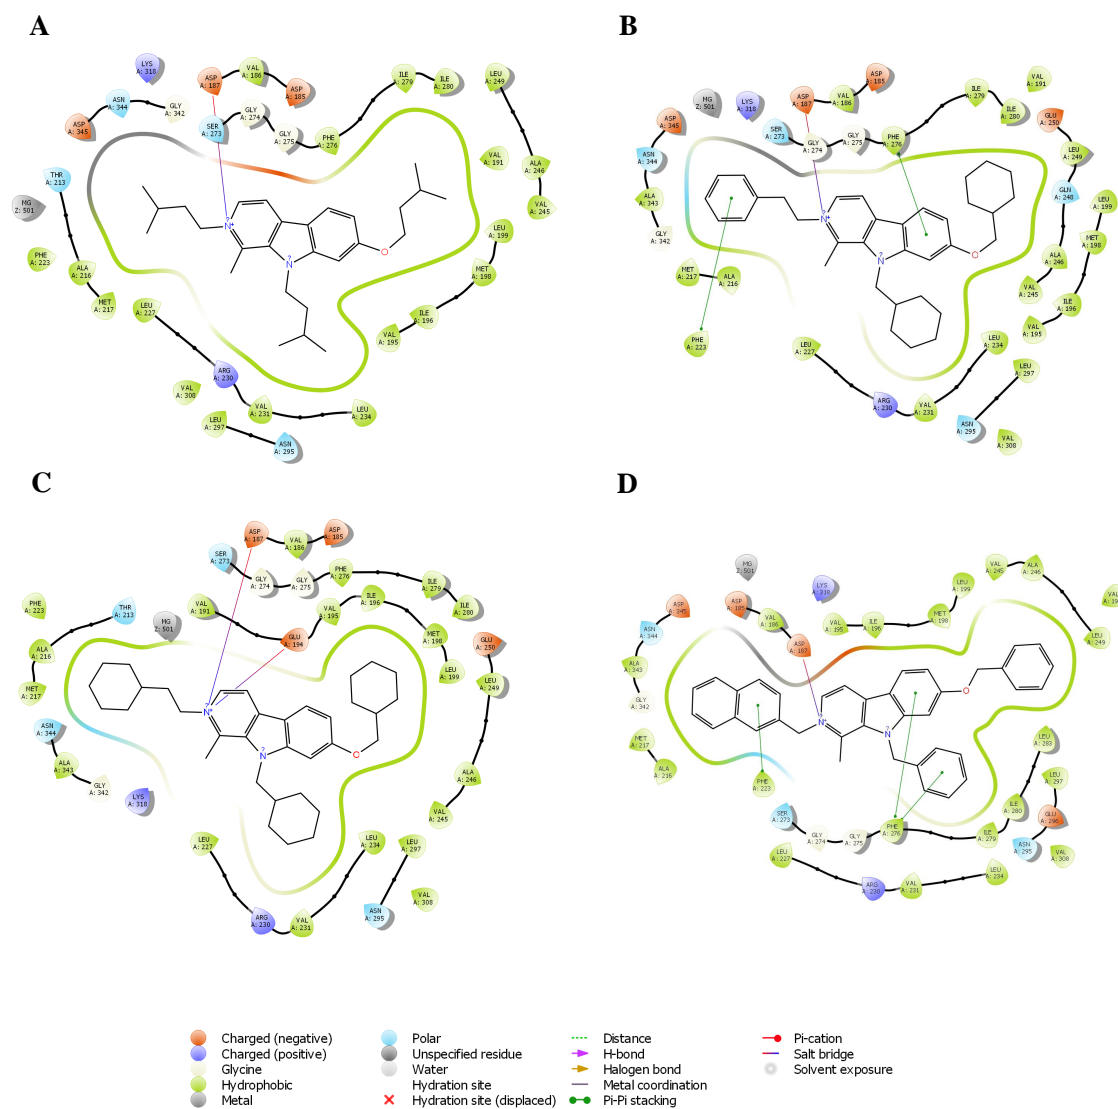

**Figure S2.** Two-dimension projection of docked compounds **88** (**A**), **91** (**B**), **124** (**C**) and **95** (**D**) within the active site of SerB2.
